# Supplementary material for: Study on the Antihypertensive Mechanism of Astragalus membranaceus and Salvia miltiorrhiza Based on Intestinal Flora-Host Metabolism
Source: Evid Based Complement Alternat Med. 2019 Jul 21;2019:5418796. doi: 10.1155/2019/5418796 (PMC6679867; doi:10.1155/2019/5418796)
Supplement: Supplementary Materials — Details of the 16 metabolites were presented in the supplementary materials (Table S). [file 5418796.f1.xlsx]

## Sheet: Sheet1
Name	Formula	Molecular Weight	RT [min]	all_W1	all_W2	all_W3	all_W4	all_W5	all_W6	all_W7	all_W8	all_M1	all_M2	all_M3	all_M4	all_M5	all_M6	all_M7	all_M8	FC	Pvalue	VIP	ROC	Up.Down
L-Glutathione(reduced)	C10 H17 N3 O6 S	307.083	1.497	1.10111e+06	613549	511248	620258	1.02446e+06	487793	773635	899208	290261	118514	92233.1	319914	189204	372112	569320	912786	2.10563	0.00973338	1.3888	0.875	up
Beta-Estradiol	C18 H24 O2	272.177	11.825	19339.7	73574.8	318350	568466	44018.4	13624	28136.8	14747.9	14802.4	16188.2	9950.34	11494	16142.5	9796.17	30076.6	16304	8.65909	0.0367832	1.86642	0.8125	up
Testosterone	C19 H28 O2	288.209	13.85	13660.8	11446.9	13770.8	11331.4	12778.5	13953.2	15229.9	18768.7	119470	245596	285483	423184	347548	210983	294936	292925	0.0499703	4.19866e-09	4.27745	1	down
Cortisone	C21 H28 O5	360.193	11.223	122370	147786	280421	354913	79025.7	154233	48669.2	85249.2	474188	643211	603206	633021	185745	270816	297456	298489	0.37364	0.00239497	1.56454	0.90625	down
Arachidonic acid	C20 H32 O2	304.24	13.624	2699.9	1487.99	2736.33	3399.71	2138.25	1637.45	1696.49	1771.7	9948.43	14336.8	17835.3	18227.2	3977.18	3642.17	3976.06	6250.68	0.22467	0.000635363	1.93053	1	down
Glycine	C2 H5 N O2	75.032	6.341	1.41665e+06	855419	819824	617416	1.87385e+06	962427	1.67061e+06	1.2088e+06	166730	92918.8	120950	284068	370264	692912	764068	871497	2.80221	0.00397078	1.8513	0.921875	up
Sphinganine 1-phosphate	C18 H40 N O5 P	381.264	14.592	1.63686e+06	1.54261e+06	1.53982e+06	1.84281e+06	1.35977e+06	927450	1.2467e+06	2.18663e+06	413970	452776	293005	412778	836835	969525	818225	857880	2.42981	0.000313446	1.37317	0.984375	up
Indoleacetic acid	C10 H9 N O2	175.063	9.459	1.97921e+06	2.63644e+06	4.59667e+06	3.8183e+06	2.42521e+06	2.13103e+06	2.51736e+06	3.03766e+06	8.17752e+06	1.01629e+07	3.96011e+06	5.80031e+06	1.5461e+07	1.15191e+07	2.48942e+07	1.24963e+07	0.25026	0.000179796	1.89509	0.984375	down
Leukotriene B4	C20 H32 O4	336.23	12.188	37293.2	29370.9	32827.7	31580	34168.7	34677.3	38073.7	38040.5	131463	180313	290237	379891	255168	190894	207700	146852	0.154855	6.61231e-07	2.62567	1	down
Gamma-Aminobutyric acid	C4 H9 N O2	103.063	1.31	1.09167e+06	846054	680477	327898	702790	696555	773414	1.48834e+06	230561	158100	250656	235751	535236	689725	665514	533599	2.0027	0.0110712	1.10324	0.921875	up
5-Hydroxyindoleacetic acid	C10 H9 N O3	191.058	8.36	1.1335e+06	590677	505466	604126	1.0338e+06	447527	882321	904888	284581	121734	88929.9	380803	179452	377163	552043	960554	2.0719	0.0124198	1.36888	0.875	up
4-Pyridoxic acid	C8 H9 N O4	183.053	5.749	83846.2	99095.7	34976.1	168458	109457	39015.7	46517.9	40373.2	2302.7	5532.82	11811.4	7186.78	5673.9	15457.1	23523.4	10152.8	7.61554	2.1289e-05	3.01229	1	up
Adrenic acid	C22 H36 O2	332.271	15.512	121557	167287	106043	109367	124673	205229	122361	134989	458867	603307	669148	304840	285583	195774	150161	220527	0.377919	0.00211336	1.27895	0.953125	down
Taurocholic acid	C26 H45 N O7 S	515.29	14.3	4473.41	19435.9	28690.1	36904.9	2357.38	4189.96	2087.09	2084.82	2363.83	2289.12	2188.69	2295.05	2054.86	4314.63	2165.85	2212.75	5.04022	0.040731	1.46986	0.765625	up
Prostaglandin E2	C20 H32 O5	352.225	10.632	1575.31	1295.07	1967.55	1540.22	1712.83	1828.06	1469.65	1712.27	42387.7	65025.4	117381	114366	46759.5	63127.5	29723.2	50449.6	0.0247552	2.82214e-08	5.21068	1	down
L-Kynurenine	C10 H12 N2 O3	208.075	3.747	783066	1.09347e+06	380509	1.64629e+06	1.11966e+06	499046	507037	435482	32712.6	45141.9	140240	67958.9	52669.9	159181	272570	64646.8	7.74087	1.32381e-05	3.12106	1	up
Name	Formula	Molecular Weight	RT [min]	all_HD1	all_HD2	all_HD3	all_HD4	all_HD5	all_HD6	all_HD7	all_HD8	all_M1	all_M2	all_M3	all_M4	all_M5	all_M6	all_M7	all_M8	FC	Pvalue	VIP	ROC	Up.Down
L-Glutathione (reduced)	C10 H17 N3 O6 S	307.083	1.497	1.10864e+06	540824	666619	794988	983801	919937	749848	701136	290261	118514	92233.1	319914	189204	372112	569320	912786	2.25734	0.00601409	2.1134	0.90625	up
Beta-Estradiol	C18 H24 O2	272.177	11.825	22693.2	46142.2	63446.9	140628	25670.7	43076.8	46783.5	221352	14802.4	16188.2	9950.34	11494	16142.5	9796.17	30076.6	16304	4.88796	0.00132685	2.73202	0.96875	up
Testosterone	C19 H28 O2	288.209	13.85	145842	149346	74222.5	152383	99378.8	107097	90971.1	139107	119470	245596	285483	423184	347548	210983	294936	292925	0.431664	0.000293741	1.67299	0.9375	down
Cortisone	C21 H28 O5	360.193	11.223	97786.7	242226	114013	236733	160188	198381	284961	347833	474188	643211	603206	633021	185745	270816	297456	298489	0.493851	0.00873783	1.41844	0.859375	down
Arachidonic acid	C20 H32 O2	304.24	13.624	2545.42	8923.71	1417.47	5662.89	2528.7	3701	3585.12	3067.22	9948.43	14336.8	17835.3	18227.2	3977.18	3642.17	3976.06	6250.68	0.401969	0.0176775	1.75126	0.875	down
Glycine	C2 H5 N O2	75.032	6.341	1.20965e+06	628731	712391	628241	1.40709e+06	1.13795e+06	783879	663157	166730	92918.8	120950	284068	370264	692912	764068	871497	2.13209	0.0136223	2.07273	0.8125	up
Sphinganine 1-phosphate	C18 H40 N O5 P	381.264	14.592	716750	809675	678227	1.04676e+06	1.40909e+06	1.4731e+06	1.08246e+06	1.60714e+06	413970	452776	293005	412778	836835	969525	818225	857880	2.04544	0.0106218	1.19644	0.8125	up
Indoleacetic acid	C10 H9 N O2	175.063	9.459	1.15572e+07	3.90997e+06	7.07761e+06	7.66016e+06	3.78799e+06	7.62901e+06	4.70066e+06	6.2469e+06	8.17752e+06	1.01629e+07	3.96011e+06	5.80031e+06	1.5461e+07	1.15191e+07	2.48942e+07	1.24963e+07	0.468494	0.0458669	1.23129	0.78125	down
Leukotriene B4	C20 H32 O4	336.23	12.188	149113	109303	77287.6	97439.7	100681	95921.1	87699.4	111396	131463	180313	290237	379891	255168	190894	207700	146852	0.464982	0.000356714	1.47562	0.96875	down
Gamma-Aminobutyric acid	C4 H9 N O2	103.063	1.31	788187	382166	710119	511360	1.32322e+06	1.40003e+06	752748	1.32942e+06	230561	158100	250656	235751	535236	689725	665514	533599	2.18155	0.00775651	1.66633	0.875	up
5-Hydroxyindoleacetic acid	C10 H9 N O3	191.058	8.36	1.11401e+06	574115	650699	772197	958031	998431	730900	773763	284581	121734	88929.9	380803	179452	377163	552043	960554	2.23143	0.00697031	2.11423	0.90625	up
4-Pyridoxic acid	C8 H9 N O4	183.053	5.749	41236.8	22287.9	32017.2	56791.7	12841.7	5292.05	14090.4	27969	2302.7	5532.82	11811.4	7186.78	5673.9	15457.1	23523.4	10152.8	2.60319	0.0221837	1.95643	0.8125	up
Adrenic acid	C22 H36 O2	332.271	15.512	161788	143006	184473	157362	149632	122188	275378	222777	458867	603307	669148	304840	285583	195774	150161	220527	0.490479	0.0155005	1.27572	0.859375	down
Taurocholic acid	C26 H45 N O7 S	515.29	14.3	24297.2	2180.62	16528.6	2023.17	4257.4	4855.17	2095.87	3337.28	2363.83	2289.12	2188.69	2295.05	2054.86	4314.63	2165.85	2212.75	2.99603	0.0484279	1.37504	0.75	up
Prostaglandin E2	C20 H32 O5	352.225	10.632	28829.5	33260.5	9462.58	18270.5	22231	33554	21841	18364.2	42387.7	65025.4	117381	114366	46759.5	63127.5	29723.2	50449.6	0.351108	0.000480327	2.03807	0.96875	down
L-Kynurenine	C10 H12 N2 O3	208.075	3.747	560077	280509	393796	682901	111635	61799.6	140817	286635	32712.6	45141.9	140240	67958.9	52669.9	159181	272570	64646.8	3.01534	0.0150985	2.20879	0.84375	up
